# Role of apolipoprotein E (ApoE) $\epsilon 4$ in cognitive impairment after a stroke: a prospective cohort study

Jia-Hung Chen<sup>1,2,3</sup>, Lung Chan<sup>2,3</sup>, Chien-Tai Hong<sup>2,3</sup>, Chaur-Jong Hu<sup>1,2,3,\*</sup>, Yi-Chen Hsieh<sup>1,\*</sup>

<sup>1</sup>Ph.D. Program in Medical Neuroscience, College of Medical Science and Technology, Taipei Medical University, Taipei, Taiwan

<sup>2</sup>Department of Neurology, School of Medicine, College of Medicine, Taipei Medical University, Taipei, Taiwan

<sup>3</sup>Department of Neurology, Taipei Medical University-Shuang Ho Hospital, New Taipei, Taiwan

\*Equal contribution

**Correspondence to:** Chaur-Jong Hu, Yi-Chen Hsieh; **email:** [chaurjongh@tmu.edu.tw](mailto:chaurjongh@tmu.edu.tw), [ychieh@tmu.edu.tw](mailto:ychieh@tmu.edu.tw)

**Keywords:** ApoE, cognitive impairment, post-stroke

**Received:** January 20, 2025

**Accepted:** April 22, 2025

**Published:** May 8, 2025

**Copyright:** © 2025 Chen et al. This is an open access article distributed under the terms of the [Creative Commons Attribution License](https://creativecommons.org/licenses/by/4.0/) (CC BY 4.0), which permits unrestricted use, distribution, and reproduction in any medium, provided the original author and source are credited.

## ABSTRACT

Although apolipoprotein E (ApoE)  $\epsilon 4$  is a well-established risk factor for Alzheimer disease, its role in the development of post-stroke cognitive impairment (PSCI) remains uncertain. In this prospective cohort study, we recruited patients aged  $\geq 20$  years who had ischemic stroke within the past 7 days and measured their ApoE genotype. Baseline characteristics, including age, sex, education level, medical history, stroke severity, stroke etiology, and neuroimaging findings were recorded. Cognitive function was evaluated using the Montreal Cognitive Assessment (MoCA) and Clinical Dementia Rating (CDR) at 3 and 12 months post-stroke, with PSCI defined as a MoCA score  $< 26$ . After adjusting for confounding factors, the ApoE  $\epsilon 4$  allele was not associated with the risk of PSCI at 3 or 12 months post-stroke. Other factors, including age, body mass index, education level, and initial stroke severity, were found to be associated with the risk of PSCI at 3 months. In patients who developed PSCI at 12 months, only education level and the MoCA score at 3 months were significantly associated with the risk of PSCI. Our findings suggest that, aside from traditional risk factors, the ApoE  $\epsilon 4$  allele does not contribute to the risk of PSCI at 3 or 12 months post-stroke. Further studies with a larger sample size and longer follow-up are warranted.

## INTRODUCTION

Stroke is the third leading cause of death and the fourth leading cause of disability-adjusted life years worldwide, contributing substantially to post-event disability [1]. Although its impact on physical function is well documented, stroke can also precipitate a diverse range of cognitive challenges. A meta-analysis of 16 hospital-based studies reported that more than 50% of stroke survivors develop neurocognitive disorders following stroke onset [2]. These cognitive deficits encompass disruptions in memory, attention, language, executive functions, and other cognitive processes [3]. Additionally, the severity of post-stroke cognitive impairment (PSCI) considerably varies

among individuals and is influenced by a combination of stroke-related characteristics, vascular risk factors, and non-modifiable factors including age, genetic variants, and pre-existing cognitive conditions [4, 5].

The apolipoprotein E (ApoE) genotype is a well-established genetic determinant of cognitive impairment [6]. The ApoE gene is polymorphic and comprises three primary alleles:  $\epsilon 2$ ,  $\epsilon 3$ , and  $\epsilon 4$ . Among these, the ApoE  $\epsilon 4$  allele is particularly notable due to its strong association with an increased risk of late-onset Alzheimer's disease (AD), the most common form of dementia [7]. Individuals who carry one copy of the ApoE  $\epsilon 4$  allele are at an increased risk of developing AD compared with those who do not. This elevated risk is

partly attributed to disruptions in lipid metabolism and transport in the brain, mediated by the ApoE protein [8].

Although PSCI shares some pathological features with AD, the association between the ApoE  $\epsilon 4$  allele and PSCI remains underexplored. Studies investigating the risk of PSCI in relation to ApoE  $\epsilon 4$  status are limited and have yielded inconclusive results, with some reporting a positive association and others reporting no significant effect [9–11]. To address this uncertainty, we conducted a cohort study of stroke patients and assessed their cognitive function at different time points following stroke onset. This investigation aimed to elucidate whether the presence of the ApoE  $\epsilon 4$  allele contributes to an elevated risk of cognitive decline following a stroke.

## RESULTS

### Participant characteristics

As shown in Figure 1, a total of 380 patients were enrolled in the cohort. Of these, 27 were excluded due to missing Montreal Cognitive Assessment (MoCA) scores

at 3 months, and an additional 97 were excluded because of missing ApoE genotype results. Thus, 256 patients remained, among whom 124 were classified as having PSCI at 3 months, whereas 132 were not. A comparison of the two groups revealed that patients with PSCI exhibited significantly lower MoCA scores at both 3 months ( $19.45 \pm 6.19$  vs.  $28.06 \pm 2.79$ ,  $p < 0.0001$ ) and 12 months ( $20.02 \pm 7.73$  vs.  $28.09 \pm 1.39$ ,  $p < 0.0001$ ). Additionally, those with PSCI were older ( $64.06 \pm 10.13$  vs.  $53.39 \pm 10.40$ ,  $p < 0.0001$ ), had a lower body mass index (BMI;  $25.55 \pm 3.56$  vs.  $26.79 \pm 4.57$ ,  $p = 0.0196$ ), and had lower educational attainment ( $42.98\%$  vs.  $8.33\%$ ,  $p < 0.0001$ ). They also consumed alcohol less frequently ( $14.29\%$  vs.  $25.81\%$ ,  $p = 0.0253$ ) and had higher median National Institutes of Health Stroke Scale (NIHSS) scores (4 vs. 3,  $p = 0.0008$ ). Furthermore, Fazekas scores on brain magnetic resonance imaging (MRI) were higher in patients with PSCI than in those without PSCI ( $p < 0.0001$ ). However, no significant differences were observed between the groups in terms of sex, marital status, ApoE  $\epsilon 4$  prevalence, medical history, stroke etiology, or plasma biomarker levels. The participant characteristics are detailed in Table 1.

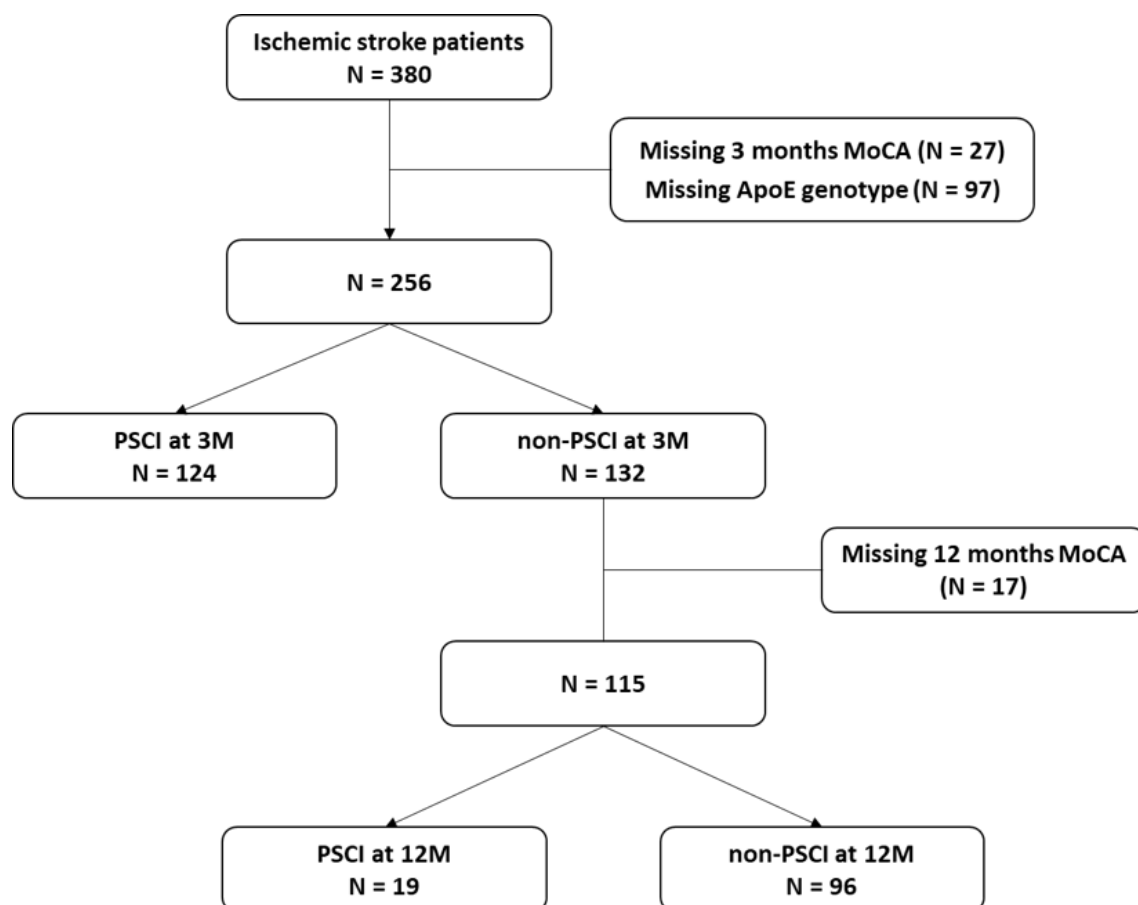

Figure 1. Patient selection flowchart.

**Table 1. Characteristics of participants with and without PSCI at 3 months.**

| Variable                              | With PSCI ( <i>n</i> = 124) | Without PSCI ( <i>n</i> = 132) | <i>p</i> |
|---------------------------------------|-----------------------------|--------------------------------|----------|
| <b>Demographics (n/%)</b>             |                             |                                |          |
| Age (mean ± SD)                       | 64.06 (10.13)               | 53.39 (10.40)                  | <0.0001  |
| BMI (mean ± SD)                       | 25.55 (3.56)                | 26.79 (4.57)                   | 0.0196   |
| Male                                  | 89 (71.77)                  | 93 (70.45)                     | 0.8159   |
| Education ≤6 years                    | 52 (42.98)                  | 11 (8.33)                      | <0.0001  |
| Married                               | 74 (81.32)                  | 82 (74.55)                     | 0.2515   |
| Alcohol consumption                   | 17 (14.29)                  | 32 (25.81)                     | 0.0253   |
| Smoking habit                         | 63 (52.94)                  | 72 (57.14)                     | 0.5087   |
| ApoE ε4 carrier                       | 23 (18.55)                  | 22 (16.67)                     | 0.6926   |
| <b>Medical history (n/%)</b>          |                             |                                |          |
| HTN                                   | 97 (78.86)                  | 84 (68.29)                     | 0.0601   |
| DM                                    | 50 (40.65)                  | 39 (33.05)                     | 0.2217   |
| Dyslipidemia                          | 85 (70.25)                  | 89 (70.63)                     | 0.9469   |
| Heart disease                         | 29 (24.58)                  | 27 (22.69)                     | 0.7324   |
| <b>Stroke severity</b>                |                             |                                |          |
| NIHSS score (median/IQR)              | 4 (3–5)                     | 3 (1–5)                        | 0.0008   |
| <b>TOAST classification (n/%)</b>     |                             |                                |          |
| Large artery atherosclerosis          | 30 (26.09)                  | 22 (18.03)                     | 0.4055   |
| Cardioembolism                        | 11 (9.57)                   | 12 (9.84)                      |          |
| Small vessel occlusion                | 68 (59.13)                  | 75 (61.48)                     |          |
| Other determined etiology             | 2 (1.74)                    | 4 (3.28)                       |          |
| Undetermined etiology                 | 4 (3.48)                    | 9 (7.38)                       |          |
| <b>Fazekas scale</b>                  |                             |                                |          |
| Periventricular white matter          |                             |                                |          |
| 0                                     | 23 (22.77)                  | 55 (57.89)                     | <0.0001  |
| 1                                     | 32 (31.68)                  | 27 (28.42)                     |          |
| 2                                     | 13 (12.87)                  | 4 (4.21)                       |          |
| 3                                     | 33 (32.67)                  | 9 (9.47)                       |          |
| Deep white matter                     |                             |                                |          |
| 0                                     | 21 (22.83)                  | 35 (39.33)                     | 0.0009   |
| 1                                     | 33 (35.87)                  | 41 (46.07)                     |          |
| 2                                     | 23 (25.00)                  | 8 (8.99)                       |          |
| 3                                     | 15 (16.30)                  | 5 (5.62)                       |          |
| <b>Plasma biomarkers (pg/mL)</b>      |                             |                                |          |
| Aβ 42                                 | 16.20 (1.56)                | 16.55 (1.60)                   | 0.0915   |
| Aβ 40                                 | 49.84 (5.19)                | 47.24 (6.32)                   | 0.0858   |
| Aβ 42/40 ratio                        | 0.34 (0.07)                 | 0.39 (0.12)                    | 0.0704   |
| Tau                                   | 20.90 (6.61)                | 22.29 (6.51)                   | 0.0970   |
| BDNF                                  | 670.17 (259.98)             | 716.58 (215.23)                | 0.3660   |
| Ptau181                               | 3.65 (0.90)                 | 3.81 (1.04)                    | 0.2220   |
| <b>Cognitive function (mean ± SD)</b> |                             |                                |          |
| MoCA 3 months                         | 19.45 (6.19)                | 28.06 (2.79)                   | <0.0001  |
| MoCA 12 months                        | 20.02 (7.73)                | 28.09 (1.39)                   | <0.0001  |

PSCI, post-stroke cognitive impairment; BMI, body mass index; ApoE, apolipoprotein E; HTN, hypertension; DM, diabetic mellitus; NIHSS, National Institutes of Health Stroke Scale; TOAST, Trial of ORG 10172 in Acute Stroke Treatment; Aβ, amyloid beta; BDNF, brain-derived neurotrophic factor; MoCA, Montreal Cognitive Assessment.

### Factors associated with progression to PSCI at 12 months in patients initially classified as non-PSCI at 3 months

Among patients initially classified as non-PSCI at 3 months, 17 were lost to follow-up at 12 months. Of the remaining 115 patients, 19 developed PSCI by 12 months (Figure 1). Patients who subsequently developed PSCI at 12 months had significantly lower MoCA score at 12 months ( $19.37 \pm 8.79$  vs.  $28.61 \pm 1.39$ ,  $p = 0.0002$ ). These individuals demonstrated lower levels of education (26.32% vs. 6.25%,  $p = 0.0107$ ), higher median NIHSS scores (5 vs. 2,  $p = 0.0046$ ), and lower MoCA scores at 3 months compared with those who did not develop PSCI ( $27.21 \pm 1.32$  vs.  $28.23 \pm 1.36$ ,  $p = 0.00033$ ). Conversely, other factors associated with PSCI at 3 months, such as age, BMI, alcohol consumption, and Fazekas scores on brain MRI, did not differ significantly between those who did and did not develop PSCI by 12 months. Additionally, no significant differences were noted in ApoE  $\epsilon 4$  prevalence, medical history, stroke etiology, or plasma biomarker levels between the two groups (Table 2).

### Multivariate regression analyses of ApoE and other risk factors for PSCI

To investigate the association between ApoE  $\epsilon 4$  and PSCI development, we conducted multivariate regression analyses for participants with PSCI at 3 months by using three models (Table 3). Each model was adjusted for various factors to identify significant predictors of PSCI. In Model I and Model II, the presence of ApoE  $\epsilon 4$  was not significantly associated with PSCI (odds ratio [OR] = 1.18,  $p = 0.6634$  in Model I and OR = 1.22,  $p = 0.6018$  in Model II). However, in Model III, which had additional variables adjusted for, the presence of ApoE  $\epsilon 4$  was close to significant, but not quite, as a predictor of increased PSCI risk (OR = 3.01,  $p = 0.0609$ ).

Among other risk factors, age was consistently associated with an increased risk of PSCI across all models (OR = 1.18,  $p < 0.0001$  in Model I; OR = 1.08,  $p < 0.0001$  in Model II; OR = 1.09,  $p = 0.0017$  in Model III). Similarly, a higher education level (defined as  $>6$  years of schooling) consistently acted as a protective factor against PSCI across all models (OR = 0.41,  $p = 0.0001$  in Model I; OR = 0.41,  $p = 0.0004$  in Model II; OR = 0.41,  $p = 0.0095$  in Model III). In Model III, initial stroke severity was positively correlated with PSCI (OR = 1.25,  $p = 0.0183$ ), whereas BMI was negatively correlated with PSCI (OR = 0.87,  $p = 0.0214$ ). However, alcohol consumption and the Fazekas scale were not significantly associated with PSCI in Model III (OR = 0.84,  $p = 0.7795$  and OR = 1.37,  $p = 0.2075$ , respectively).

For those who subsequently developed PSCI, multivariate analysis across three models revealed that the presence of ApoE  $\epsilon 4$  was not significantly associated with the development of PSCI in any of the models (OR = 0.71,  $p = 0.6464$  in Model I; OR = 0.55,  $p = 0.4393$  in Model II; OR = 0.83,  $p = 0.8233$  in Model III; Table 4). However, a higher education level consistently functioned as a protective factor against the development of PSCI at 12 months, with significant associations observed across all models (OR = 0.33,  $p = 0.0070$  in Model I; OR = 0.37,  $p = 0.0182$  in Model II; OR = 0.43,  $p = 0.0481$  in Model III). Additionally, the MoCA score at 3 months was a significant predictor of subsequent PSCI, with lower scores at 3 months indicating a higher risk of cognitive decline at 12 months (OR = 0.59,  $p = 0.0169$ ).

Since PSCI could also be evaluated using the Clinical Dementia Rating (CDR), we defined a CDR score  $\geq 0.5$  as indicative of PSCI and re-tested our model accordingly (Supplementary Tables 1, 2). After multivariate regression analyses, ApoE  $\epsilon 4$  was not associated with the risk of PSCI across all models, both at 3 months (OR = 0.80,  $p = 0.5587$  in Model I; OR = 0.71,  $p = 0.3756$  in Model II; OR = 0.79,  $p = 0.6181$  in Model III; Supplementary Table 3) and 12 months (OR = 0.41,  $p = 0.2692$  in Model I; OR = 0.35,  $p = 0.2678$  in Model II; OR = 0.56,  $p = 0.5682$  in Model III; Supplementary Table 4) post stroke.

## DISCUSSION

In this prospective cohort study, we investigated the association between the presence of ApoE  $\epsilon 4$  and the development of PSCI. After adjustments for potential confounders, such as age, education level, initial stroke severity, BMI, alcohol consumption, and the Fazekas scale, our findings did not reveal a significant association between ApoE  $\epsilon 4$  and PSCI at 3 or 12 months post-stroke. Other factors, including age, BMI, education level, and initial stroke severity, were identified as significant predictors of PSCI development at 3 months. Furthermore, education level and the MoCA score at 3 months were identified as significant predictors of the subsequent development of PSCI at 12 months.

The ApoE  $\epsilon 4$  has been associated with various neurodegenerative diseases, including AD, Parkinson's disease, ischemic stroke, and multiple sclerosis [12–15]. ApoE plays a crucial role in cholesterol transport and lipid distribution within the brain, which may contribute to the pathophysiology of neurodegeneration [16, 17]. The  $\epsilon 4$  variant was demonstrated to impair the ability of ApoE to effectively clear A $\beta$  plaques, a hallmark of AD [18]. This dysfunction leads to the accumulation of

**Table 2. Characteristics of participants with and without progression to PSCI at 12 months from non-PSCI at 3 months.**

| Variable                              | With progression to PSCI ( <i>n</i> = 19) | Without progression to PSCI ( <i>n</i> = 96) | <i>p</i> |
|---------------------------------------|-------------------------------------------|----------------------------------------------|----------|
| <b>Demographics (n/%)</b>             |                                           |                                              |          |
| Age (mean ± SD)                       | 55.26 (13.47)                             | 53.24 (10.14)                                | 0.4544   |
| BMI (mean ± SD)                       | 27.99 (3.08)                              | 26.59 (4.672.5)                              | 0.2532   |
| Male                                  | 14 (73.68)                                | 68 (70.68)                                   | 0.8018   |
| Education ≤6 years                    | 5 (26.32)                                 | 6 (6.25)                                     | 0.0107   |
| Married                               | 10 (61.43)                                | 59 (71.95)                                   | 1.0000   |
| Alcohol consumption                   | 2 (10.53)                                 | 25 (28.41)                                   | 0.1467   |
| Smoking habit                         | 10 (52.63)                                | 48 (53.33)                                   | 0.9556   |
| ApoE ε4 carrier                       | 3 (15.79)                                 | 15 (15.63)                                   | 1.0000   |
| <b>Medical history (n/%)</b>          |                                           |                                              |          |
| HTN                                   | 15 (78.95)                                | 56 (63.64)                                   | 0.2002   |
| DM                                    | 7 (36.84)                                 | 25 (30.12)                                   | 0.5690   |
| Dyslipidemia                          | 15 (78.95)                                | 62 (68.89)                                   | 0.3817   |
| Heart disease                         | 4 (21.05)                                 | 19 (22.62)                                   | 1.0000   |
| <b>Stroke severity</b>                |                                           |                                              |          |
| NIHSS score (median/IQR)              | 5 (3–7)                                   | 2.5 (1–4)                                    | 0.0046   |
| <b>TOAST classification (n/%)</b>     |                                           |                                              |          |
| Large artery atherosclerosis          | 3 (15.79)                                 | 15 (16.85)                                   | 0.2119   |
| Cardioembolism                        | 4 (21.05)                                 | 7 (7.87)                                     |          |
| Small vessel occlusion                | 9 (47.37)                                 | 58 (65.17)                                   |          |
| Other determined etiology             | 0 (0)                                     | 3 (3.37)                                     |          |
| Undetermined etiology                 | 3 (15.79)                                 | 6 (6.74)                                     |          |
| <b>Fazekas scale</b>                  |                                           |                                              |          |
| Periventricular white matter          |                                           |                                              |          |
| 0                                     | 6 (46.15)                                 | 46 (62.16)                                   | 0.3000   |
| 1                                     | 4 (30.77)                                 | 19 (25.68)                                   |          |
| 2                                     | 0 (0)                                     | 3 (4.05)                                     |          |
| 3                                     | 3 (23.08)                                 | 6 (8.11)                                     |          |
| Deep white matter                     |                                           |                                              |          |
| 0                                     | 6 (54.55)                                 | 28 (39.44)                                   | 0.0970   |
| 1                                     | 2 (18.18)                                 | 33 (46.48)                                   |          |
| 2                                     | 1 (9.09)                                  | 7 (9.86)                                     |          |
| 3                                     | 2 (18.18)                                 | 3 (4.23)                                     |          |
| <b>Plasma biomarkers (pg/mL)</b>      |                                           |                                              |          |
| Aβ 42                                 | 16.42 (1.70)                              | 16.60 (1.64)                                 | 0.6848   |
| Aβ 40                                 | 50.19 (8.10)                              | 46.07 (6.02)                                 | 0.2320   |
| Aβ 42/40 ratio                        | 0.35 (0.13)                               | 0.40 (0.12)                                  | 0.4119   |
| Tau                                   | 20.14 (6.95)                              | 22.57 (6.60)                                 | 0.1700   |
| BDNF                                  | 578.88 (197.68)                           | 747.68 (213.16)                              | 0.0635   |
| Ptau181                               | 3.64 (0.97)                               | 3.83 (1.07)                                  | 0.5060   |
| <b>Cognitive function (mean ± SD)</b> |                                           |                                              |          |
| MoCA 3 months                         | 27.21 (1.32)                              | 28.23 (1.36)                                 | 0.0033   |
| MoCA 12 months                        | 19.37 (8.79)                              | 28.61 (1.39)                                 | 0.0002   |

PSCI, post-stroke cognitive impairment; BMI, body mass index; ApoE, apolipoprotein E; HTN, hypertension; DM, diabetic mellitus; NIHSS, National Institutes of Health Stroke Scale; TOAST, Trial of ORG 10172 in Acute Stroke Treatment; Aβ, amyloid beta; BDNF, brain-derived neurotrophic factor; MoCA, Montreal Cognitive Assessment.

**Table 3. Multivariate analysis results for participants with PSCI at 3 months.**

|                         | Model I          |          | Model II         |          | Model III        |          |
|-------------------------|------------------|----------|------------------|----------|------------------|----------|
|                         | OR (95%CI)       | <i>p</i> | OR (95%CI)       | <i>p</i> | OR (95%CI)       | <i>p</i> |
| Non-ApoE ε4 carrier     | 1.0              |          | 1.0              |          | 1.0              |          |
| ApoE ε4 carrier         | 1.18 (0.56-2.47) | 0.6634   | 1.22 (0.58-2.60) | 0.6018   | 3.01 (0.95-9.50) | 0.0609   |
| Age                     | 1.18 (1.05-2.47) | <0.0001  | 1.08 (0.05-1.12) | <0.0001  | 1.09 (1.03-1.15) | 0.0017   |
| Education >6 years      | 0.41 (0.26-0.65) | 0.0001   | 0.41 (0.26-0.67) | 0.0004   | 0.41 (0.21-0.80) | 0.0095   |
| Initial stroke severity |                  |          | 1.05 (0.96-1.14) | 0.3017   | 1.25 (1.04-1.50) | 0.0183   |
| BMI                     |                  |          |                  |          | 0.87 (0.77-0.98) | 0.0214   |
| Alcohol consumption     |                  |          |                  |          | 0.84 (0.25-2.87) | 0.7795   |
| Fazekas scale           |                  |          |                  |          | 1.37 (0.84-2.25) | 0.2075   |

Model I: Adjusted for age and education level.

Model II: Adjusted for age, education level, and initial stroke severity.

Model III: Adjusted for age, education level, initial stroke severity, BMI, alcohol drinking, and Fazekas scale.

PSCI, post-stroke cognitive impairment; OR, odds ratio; ApoE, apolipoprotein E; BMI, body mass index.

**Table 4. Multivariate analysis results for participants who developed PSCI at 12 months.**

|                         | Model I          |          | Model II         |          | Model III        |          |
|-------------------------|------------------|----------|------------------|----------|------------------|----------|
|                         | OR (95%CI)       | <i>p</i> | OR (95%CI)       | <i>p</i> | OR (95%CI)       | <i>p</i> |
| Non-ApoE ε4 carrier     | 1.0              |          | 1.0              |          | 1.0              |          |
| ApoE ε4 carrier         | 0.71 (0.17–2.96) | 0.6464   | 0.55 (0.12–2.53) | 0.4393   | 0.83 (0.17–4.18) | 0.8233   |
| Education >6 years      | 0.33 (0.14–0.74) | 0.0070   | 0.37 (0.16–0.84) | 0.0182   | 0.43 (0.18–0.99) | 0.0481   |
| Initial stroke severity |                  |          | 1.06 (0.96–1.18) | 0.2536   | 1.05 (0.94–1.17) | 0.3604   |
| MoCA score at 3M        |                  |          |                  |          | 0.59 (0.38–0.91) | 0.0169   |

Model I: Adjusted for education level.

Model II: Adjusted for education level and initial stroke severity.

Model III: Adjusted for education level, initial stroke severity, and MoCA score at 3M.

PSCI, post-stroke cognitive impairment; OR, odds ratio; ApoE, apolipoprotein E; MoCA, Montreal Cognitive Assessment.

amyloid plaques in the brain, which are neurotoxic and contribute to cognitive impairment. In patients with small subcortical infarctions, Aβ positivity has been identified as a significant predictor of PSCI development and cognitive decline over 1 year, suggesting that ApoE ε4 may influence PSCI through its role in Aβ accumulation [19]. However, our study did not observe a significant association between ApoE ε4 and the development of PSCI. Additionally, Aβ levels did not differ between individuals with and without PSCI. This inconsistent result may stem from differences in patient groups and methods used to measure Aβ burden, as our study examined blood samples rather than amyloid positron emission tomography scan. Nevertheless, the lack of a difference in blood Aβ levels may explain why our study did not demonstrate an association between ApoE ε4 and PSCI.

Previous research on the association between ApoE ε4 and cognitive decline after stroke is controversial. Some

studies have indicated that carriers of the ApoE ε4 are at an increased risk of developing cognitive impairment following a stroke. In the Canadian Study of Health and Aging (CSHA), a higher prevalence of dementia, ranging from 40.6% to 57.6%, was observed in older patients who had both a stroke and the ApoE ε4 allele [20]. A similar association was observed in a small population study in China, which suggested that ApoE gene polymorphism is associated with cognitive impairment in post-stroke patients [21]. However, the CSHA study enrolled patients with an average age of over 80 years, which was older than the average age of around 60 years in our study. Additionally, the study conducted in China included patients with higher NIHSS scores, averaging 8-10, compared to an average score of 4 in our study. Therefore, the results of our study may not be directly comparable to these studies.

Although our study did not support an association between ApoE ε4 and PSCI, the findings were consistent



with those of other studies. In a Korean study, a comparison between patients with AD, vascular dementia (VD), and normal controls suggest that ApoE  $\epsilon 4$  allele was not more prevalent in the VD patients [22]. A similar finding was observed in a Bahraini cohort, which demonstrated no significant associations between ApoE genotype and cognitive impairment post stroke [23]. Furthermore, data from the Oxford Vascular Study have indicated that the association between ApoE  $\epsilon 4$  and PSCI is independent of cerebrovascular burden, potentially mediated by increased neurodegenerative pathology or heightened vulnerability to injury [24]. Therefore, cognitive decline after stroke may not be accelerated by the presence of ApoE  $\epsilon 4$ , which is consistent with the Chicago Health and Aging Project (CHAP) study, suggesting that cognitive decline before and after stroke was not significantly different among those with the ApoE  $\epsilon 4$  allele [25].

In addition to ApoE  $\epsilon 4$ , several other factors, such as age, BMI, education level, and initial stroke severity, were identified to be significant contributors to the development of PSCI in our study. As expected, advanced age was associated with a higher risk of cognitive impairment post-stroke, consistent with the general age-related decline in cognitive function observed in other stroke populations, particularly among those carrying ApoE  $\epsilon 4$  [26]. Lower BMI was also identified as a risk factor for cognitive impairment in the Asian population, which may be mediated by factors such as nutritional deficiencies, reduced brain volume, and poorer metabolic health [27, 28]. Education level, a key determinant of cognitive function, has also been demonstrated to act as a protective factor against cognitive decline, which may be attributed to the cognitive reserve hypothesis [29]. In the Rotterdam Study, individuals with higher education levels exhibited lower risks of developing dementia following a stroke or transient ischemic attack [30]. Consistent with this finding, the present study demonstrated a lower risk of PSCI among patients with more than 6 years of education. Furthermore, in the present study, more severe initial stroke symptoms were associated with a higher risk of developing PSCI, supporting the hypothesis that the extent of brain damage at the time of the stroke directly influences cognitive outcomes [31, 32]. However, further investigation is needed because most patients in the present study had lower NIHSS scores, with an average score of 4.

Interestingly, although alcohol consumption was not revealed as a significant predictor in the multivariate analysis, it was more commonly reported among patients without PSCI. Some studies have suggested that moderate alcohol consumption may exert a protective effect on cognitive function, whereas

excessive alcohol consumption could lead to cognitive decline [33, 34]. However, in the present study, the exact quantity of alcohol consumed by each individual could not be measured, and alcohol use was assessed using self-reported data, which may be subject to reporting bias. Patients with cognitive impairment may have underreported their alcohol consumption due to memory difficulties or lack of awareness, whereas those without PSCI may have been more accurate or forthcoming in their reporting. Therefore, further research involving more precise methods for measuring alcohol intake should be considered to elucidate the potential role of alcohol in post-stroke cognitive health.

Although several risk factors were identified as contributors to PSCI at 3 months, the contributions of some of these factors were not significant in those who subsequently developed PSCI at 12 months. A lower education level was consistently associated with the development of subsequent PSCI, whereas age, stroke severity, and ApoE  $\epsilon 4$  were not. Notably, the MoCA score at 3 months was specifically associated with subsequent PSCI. These findings suggest that despite ApoE  $\epsilon 4$  may accelerate cognitive decline in the early post-stroke phase, its impact may diminish over time. By contrast, factors such as education level and MoCA scores are more significant predictors of long-term PSCI development. This underscores the importance of early and ongoing cognitive monitoring in stroke survivors.

The strength of this study lies in its comprehensive evaluation of multiple risk factors for PSCI, particularly the ApoE  $\epsilon 4$  genotype. Additionally, the prospective design enables the observation of changes over time, providing valuable insights into the development of PSCI at both 3 and 12 months post-stroke. However, the study has some limitations that must be addressed. First, the relatively mild stroke severity in our cohort may limit the generalizability of the results to patients with more severe strokes or different stroke subtypes. Second, our study did not assess stroke location or stroke volume in patients, both of which are thought to have a significant impact on the development of PSCI. However, the patients included in our study had relatively low NIHSS scores, suggesting a smaller stroke volume. Additionally, we excluded patients with large or strategic infarcts, which further minimized the potential impact of stroke location in our study. Third, the cutoff level for MoCA used to define PSCI varies across different studies, and MoCA performance may be influenced by education level, making it challenging to establish a precise cutoff. Nevertheless, we used the CDR as an alternative neuropsychological tool to re-analyze the association between ApoE  $\epsilon 4$  and PSCI, and this consistently showed no significant association. Finally, unmeasured factors such as other genetic

variants, comorbidities, and lifestyle factors may have contributed to residual confounding. Further research is required to explore these variables and enhance the understanding of PSCI in stroke survivors.

In conclusion, our study did not demonstrate an association between ApoE  $\epsilon$ 4 and the development of PSCI. Other factors, such as advanced age, lower BMI, lower education level, and more severe initial stroke symptoms, were identified as predictors of PSCI development. Additionally, the MoCA score at 3 months was found to be a significant predictor of cognitive decline at 12 months, highlighting the importance of early cognitive assessment and ongoing monitoring in stroke survivors.

## MATERIALS AND METHODS

### Study design and participants

This prospective cohort study investigated cognitive outcomes in patients following acute ischemic stroke. Since 2015, patients aged  $\geq 20$  years admitted to Taipei Medical University—Shuang Ho Hospital due to acute ischemic stroke within 7 days of symptom onset were screened for eligibility. Individuals with a history of premorbid cognitive impairment, mood disorders, or neurodegenerative diseases that affected their daily activities were excluded from the study. To focus on post-stroke cognitive trajectories, we also excluded the following patients: (1) those with large infarcts that resulted in immediate consciousness impairment; (2) those with strategic infarcts involving the hippocampus or medial frontal cortex; and (3) those with severe language or physical disabilities precluding neuropsychological assessment. All eligible participants underwent baseline evaluation within 7 days of stroke onset. Follow-up assessments were conducted at the outpatient department at 3 and 12 months post-stroke. This study was approved by the Joint Institutional Review Board of Taipei Medical University (N202104050), and written informed consent was obtained from all participants or their legal guardians.

### Data collection

Baseline characteristics, including age, sex, education level, personal and medical history, stroke severity, and stroke etiology, were collected during enrollment by study-trained nurses and subsequently reviewed by the principal investigators. Stroke severity was assessed using the NIHSS, and stroke etiology was classified according to the Trial of ORG 10172 in Acute Stroke Treatment criteria. Upon admission, all the participants underwent brain MRI to confirm the presence of acute

ischemic stroke, as evidenced by diffusion-weighted images. White matter hyperintensities were also evaluated using the Fazekas rating scale. To assess cognitive function, the MoCA and CDR were performed at 3 and 12 months post-stroke. In this study, patients with a MoCA score  $< 26$  at 3 months post-stroke were classified as having PSCI. Additionally, blood samplings were collected upon admission for ApoE genotype analysis and plasma biomarker measurements.

### ApoE genotype and plasma biomarker measurement

Blood samples were collected through venous draw within 7 days of stroke onset. The collected samples were then centrifuged at  $1,500 \times g$  for 15 min at room temperature, after which plasma from ethylenediaminetetraacetic acid tubes was aliquoted into 0.5-mL microcentrifuge tubes and stored at  $-80^{\circ}\text{C}$  until analysis. To determine the ApoE genotype, DNA was extracted using the QIAamp 250 DNA Blood Maxi Kit (QIAGEN, Clayton VIC, Australia) following the manufacturer's protocol. The ApoE SNPs were genotyped using the TaqMan allelic discrimination assay (Applied Biosystems, Foster City, CA, USA). Plasma levels of amyloid beta ( $A\beta$ ) 40,  $A\beta$ 42, and tau were measured using immunomagnetic reduction assays developed by MagQu (New Protein Analysis, Taipei City, Taiwan). Additionally, plasma levels of brain-derived neurotrophic factor were quantified using an enzyme-linked immunosorbent assay with cytokine detection kits (DY248; R&D Systems, Minneapolis, MN, USA).

### Statistical analysis

Data were analyzed using descriptive and inferential statistical methods. Continuous variables are expressed in terms of the mean  $\pm$  standard deviation, whereas categorical variables are presented as frequencies and percentages. Between-group comparisons were performed using independent  $t$  tests for continuous variables and chi-square tests for categorical variables. To identify factors associated with the development of PSCI at 3 and 12 months post-stroke, multivariate logistic regression analyses were performed. Three models were constructed for each outcome (PSCI at 3 months and PSCI at 12 months) to account for various potential confounding factors. All statistical analyses were conducted using SAS (version 9.4, Cary, NC, USA). A two-tailed  $p$ -value of  $<0.05$  was considered statistically significant.

### Abbreviations

PSCI: post-stroke cognitive impairment; ApoE: apolipoprotein E; AD: Alzheimer's disease; MoCA:



Montreal Cognitive Assessment; BMI: body mass index; NIHSS: National Institutes of Health Stroke Scale; MRI: magnetic resonance imaging; OR: odds ratio; CDR: Clinical Dementia Rating; A $\beta$ : amyloid beta.

## AUTHOR CONTRIBUTIONS

Conceptualization: Jia-Hung Chen; Methodology: Yi-Chen Hsieh; Data collection: Jia-Hung Chen, Lung Chan, Chien-Tai Hong; Statistical analysis: Yi-Chen Hsieh; Writing—original draft: Jia-Hung Chen; Writing—review and editing: Chaur-Jong Hu.

## ACKNOWLEDGMENTS

We would like to express our sincere appreciation to all our colleagues for their invaluable support, guidance, and resources throughout the course of this research. This manuscript was edited by Wallace Academic Editing.

## CONFLICTS OF INTEREST

The authors declare that they have no conflicts of interest.

## ETHICAL STATEMENT AND CONSENT

This study was approved by the Joint Institutional Review Board of Taipei Medical University (N202104050). Informed consent was obtained from all participants or their legal guardians.

## FUNDING

This study was supported by the National Science and Technology Council (113-2314-B-038 -044 -).

## REFERENCES

1. GBD 2021 Nervous System Disorders Collaborators. Global, regional, and national burden of disorders affecting the nervous system, 1990–2021: a systematic analysis for the Global Burden of Disease Study 2021 [published correction appears in *Lancet Neurol.* 2024; 23:e9. [https://doi.org/10.1016/S1474-4422\(24\)00114-5](https://doi.org/10.1016/S1474-4422(24)00114-5)] [published correction appears in *Lancet Neurol.* 2024; 23:e11. [https://doi.org/10.1016/S1474-4422\(24\)00231-X](https://doi.org/10.1016/S1474-4422(24)00231-X)]. *Lancet Neurol.* 2024; 23:344–81. [https://doi.org/10.1016/S1474-4422\(24\)00038-3](https://doi.org/10.1016/S1474-4422(24)00038-3)
2. Barbay M, Diouf M, Roussel M, Godefroy O, and GRECOVASC study group. Systematic Review and Meta-Analysis of Prevalence in Post-Stroke Neurocognitive Disorders in Hospital-Based Studies. *Dement Geriatr Cogn Disord.* 2018; 46:322–34. <https://doi.org/10.1159/000492920> PMID:30504699
3. Cramer SC, Richards LG, Bernhardt J, Duncan P. Cognitive Deficits After Stroke. *Stroke.* 2023; 54:5–9. <https://doi.org/10.1161/STROKEAHA.122.041775> PMID:36542073
4. Rost NS, Brodtmann A, Pase MP, van Veluw SJ, Biffi A, Duering M, Hinman JD, Dichgans M. Post-Stroke Cognitive Impairment and Dementia. *Circ Res.* 2022; 130:1252–71. <https://doi.org/10.1161/CIRCRESAHA.122.319951> PMID:35420911
5. Filler J, Georgakis MK, Dichgans M. Risk factors for cognitive impairment and dementia after stroke: a systematic review and meta-analysis. *Lancet Healthy Longev.* 2024; 5:e31–44. [https://doi.org/10.1016/S2666-7568\(23\)00217-9](https://doi.org/10.1016/S2666-7568(23)00217-9) PMID:38101426
6. Fan J, Tao W, Li X, Li H, Zhang J, Wei D, Chen Y, Zhang Z. The Contribution of Genetic Factors to Cognitive Impairment and Dementia: Apolipoprotein E Gene, Gene Interactions, and Polygenic Risk. *Int J Mol Sci.* 2019; 20:1177. <https://doi.org/10.3390/ijms20051177> PMID:30866553
7. Belloy ME, Andrews SJ, Le Guen Y, Cuccaro M, Farrer LA, Napolioni V, Greicius MD. APOE Genotype and Alzheimer Disease Risk Across Age, Sex, and Population Ancestry. *JAMA Neurol.* 2023; 80:1284–94. <https://doi.org/10.1001/jamaneurol.2023.3599> PMID:37930705
8. Huang Y, Mahley RW. Apolipoprotein E: structure and function in lipid metabolism, neurobiology, and Alzheimer's diseases. *Neurobiol Dis.* 2014; 72 Pt A:3–12. <https://doi.org/10.1016/j.nbd.2014.08.025> PMID:25173806
9. Wagle J, Farner L, Flekkøy K, Wyller TB, Sandvik L, Eiklid KL, Fure B, Stensrød B, Engedal K. Association between ApoE epsilon4 and cognitive impairment after stroke. *Dement Geriatr Cogn Disord.* 2009; 27:525–33. <https://doi.org/10.1159/000223230> PMID:19494491
10. Wagle J, Farner L, Flekkøy K, Wyller TB, Sandvik L, Eiklid KL, Fure B, Stensrød B, Engedal K. Cognitive impairment and the role of the ApoE epsilon4-allele after stroke—a 13 months follow-up study. *Int J Geriatr Psychiatry.* 2010; 25:833–42. <https://doi.org/10.1002/gps.2425> PMID:19960482
11. Arpa A, del Ser T, Goda G, Barba R, Bornstein B. Apolipoprotein E, angiotensin-converting enzyme and alpha-1-antichymotrypsin genotypes are not

- associated with post-stroke dementia. *J Neurol Sci*. 2003; 210:77–82.  
[https://doi.org/10.1016/s0022-510x\(03\)00026-1](https://doi.org/10.1016/s0022-510x(03)00026-1)  
PMID:12736093
12. Yamazaki Y, Zhao N, Caulfield TR, Liu CC, Bu G. Apolipoprotein E and Alzheimer disease: pathobiology and targeting strategies. *Nat Rev Neurol*. 2019; 15:501–18.  
<https://doi.org/10.1038/s41582-019-0228-7>  
PMID:31367008
  13. López M, Guerrero J, Yescas P, Boll MC, Familiar I, Ochoa A, Rasmussen A, Alonso ME. Apolipoprotein E epsilon4 allele is associated with Parkinson disease risk in a Mexican Mestizo population. *Mov Disord*. 2007; 22:417–20.  
<https://doi.org/10.1002/mds.21340> PMID:17230455
  14. Qiao SY, Shang K, Chu YH, Yu HH, Chen X, Qin C, Pan DJ, Tian DS. Apolipoprotein E  $\epsilon$  4 Polymorphism as a Risk Factor for Ischemic Stroke: A Systematic Review and Meta-Analysis. *Dis Markers*. 2022; 2022:1407183.  
<https://doi.org/10.1155/2022/1407183>  
PMID:35154509
  15. Masterman T, Zhang Z, Hellgren D, Salter H, Anvret M, Lilius L, Lannfelt L, Hillert J. APOE genotypes and disease severity in multiple sclerosis. *Mult Scler*. 2002; 8:98–103.  
<https://doi.org/10.1191/1352458502ms787oa>  
PMID:11990879
  16. Mahley RW. Apolipoprotein E: from cardiovascular disease to neurodegenerative disorders. *J Mol Med (Berl)*. 2016; 94:739–46.  
<https://doi.org/10.1007/s00109-016-1427-y>  
PMID:27277824
  17. Yang LG, March ZM, Stephenson RA, Narayan PS. Apolipoprotein E in lipid metabolism and neurodegenerative disease. *Trends Endocrinol Metab*. 2023; 34:430–45.  
<https://doi.org/10.1016/j.tem.2023.05.002>  
PMID:37357100
  18. Wisniewski T, Drummond E. APOE-amyloid interaction: Therapeutic targets. *Neurobiol Dis*. 2020; 138:104784.  
<https://doi.org/10.1016/j.nbd.2020.104784>  
PMID:32027932
  19. Kang SH, Kang M, Han JH, Lee ES, Lee KJ, Chung SJ, Suh SI, Koh SB, Eo JS, Kim CK, Oh K. Independent effect of A $\beta$  burden on cognitive impairment in patients with small subcortical infarction. *Alzheimers Res Ther*. 2023; 15:178.  
<https://doi.org/10.1186/s13195-023-01307-5>  
PMID:37838715
  20. Jin YP, Østbye T, Feightner JW, Di Legge S, Hachinski V. Joint effect of stroke and APOE 4 on dementia risk: the Canadian Study of Health and Aging. *Neurology*. 2008; 70:9–16.  
<https://doi.org/10.1212/01.wnl.0000284609.77385.03>  
PMID:17978275
  21. Ma C, Wang D, Hong Z, Liu X, Zhu H, Chen L. Relationship Between Genetic Polymorphism and Cognitive Impairment in Patients with Acute Ischemic Stroke (APOE). *Altern Ther Health Med*. 2024; 30:92–7.  
PMID:38401103
  22. Kim KW, Youn JC, Han MK, Paik NJ, Lee TJ, Park JH, Lee SB, Choo IH, Lee DY, Jhoo JH, Woo JI. Lack of association between apolipoprotein E polymorphism and vascular dementia in Koreans. *J Geriatr Psychiatry Neurol*. 2008; 21:12–7.  
<https://doi.org/10.1177/0891988707311028>  
PMID:18287165
  23. Donnellan C, Redha N, Al Banna M, Al Sharoqi I, Al-Jishi A, Bakhiet M, Taha S, Abdulla F, Walsh P. Associations between ApoE gene and psychological consequences post stroke in a Bahraini cohort. *Asian J Psychiatr*. 2019; 39:135–42.  
<https://doi.org/10.1016/j.ajp.2018.12.019>  
PMID:30622009
  24. Pendlebury ST, Poole D, Burgess A, Duerden J, Rothwell PM, and Oxford Vascular Study. APOE- $\epsilon$ 4 Genotype and Dementia Before and After Transient Ischemic Attack and Stroke: Population-Based Cohort Study. *Stroke*. 2020; 51:751–8.  
<https://doi.org/10.1161/STROKEAHA.119.026927>  
PMID:32070224
  25. Rajan KB, Aggarwal NT, Schneider JA, Wilson RS, Everson-Rose SA, Evans DA. Role of APOE  $\epsilon$ 4 Allele and Incident Stroke on Cognitive Decline and Mortality. *Alzheimer Dis Assoc Disord*. 2016; 30:318–23.  
<https://doi.org/10.1097/WAD.0000000000000173>  
PMID:27849638
  26. Ballard CG, Morris CM, Rao H, O'Brien JT, Barber R, Stephens S, Rowan E, Gibson A, Kalaria RN, Kenny RA. APOE epsilon4 and cognitive decline in older stroke patients with early cognitive impairment. *Neurology*. 2004; 63:1399–402.  
<https://doi.org/10.1212/01.wnl.0000141851.93193.17>  
PMID:15505155
  27. Dong W, Kan L, Zhang X, Li M, Wang M, Cao Y. Association between body mass index and cognitive impairment in Chinese older adults. *Front Public Health*. 2023; 11:1255101.  
<https://doi.org/10.3389/fpubh.2023.1255101>  
PMID:37927863
  28. Han AR, Shin MH, Yang JH, Choi CK, Koh JT, Kim OS. Body mass index and self-rated oral health in Korean adults in 2017. *Gerodontology*. 2023; 40:183–91.

<https://doi.org/10.1111/ger.12624>  
PMID:[35152454](https://pubmed.ncbi.nlm.nih.gov/35152454/)

29. Tucker-Drob EM, Johnson KE, Jones RN. The cognitive reserve hypothesis: a longitudinal examination of age-associated declines in reasoning and processing speed. *Dev Psychol.* 2009; 45:431–46.  
<https://doi.org/10.1037/a0014012>  
PMID:[19271829](https://pubmed.ncbi.nlm.nih.gov/19271829/)
30. Mirza SS, Portegies ML, Wolters FJ, Hofman A, Koudstaal PJ, Tiemeier H, Ikram MA. Higher Education Is Associated with a Lower Risk of Dementia after a Stroke or TIA. The Rotterdam Study. *Neuroepidemiology.* 2016; 46:120–7.  
<https://doi.org/10.1159/000443649>  
PMID:[26794600](https://pubmed.ncbi.nlm.nih.gov/26794600/)
31. Cumming TB, Blomstrand C, Bernhardt J, Linden T. The NIH stroke scale can establish cognitive function after stroke. *Cerebrovasc Dis.* 2010; 30:7–14.  
<https://doi.org/10.1159/000313438>  
PMID:[20424439](https://pubmed.ncbi.nlm.nih.gov/20424439/)
32. Koton S, Pike JR, Johansen M, Knopman DS, Lakshminarayan K, Mosley T, Patole S, Rosamond WD, Schneider AL, Sharrett AR, Wruck L, Coresh J, Gottesman RF. Association of Ischemic Stroke Incidence, Severity, and Recurrence With Dementia in the Atherosclerosis Risk in Communities Cohort Study. *JAMA Neurol.* 2022; 79:271–80.  
<https://doi.org/10.1001/jamaneurol.2021.5080>  
PMID:[35072712](https://pubmed.ncbi.nlm.nih.gov/35072712/)
33. Zhang R, Shen L, Miles T, Shen Y, Cordero J, Qi Y, Liang L, Li C. Association of Low to Moderate Alcohol Drinking With Cognitive Functions From Middle to Older Age Among US Adults. *JAMA Netw Open.* 2020; 3:e207922.  
<https://doi.org/10.1001/jamanetworkopen.2020.7922>  
PMID:[32597992](https://pubmed.ncbi.nlm.nih.gov/32597992/)
34. Ge S, Wei Z, Liu T, Wang J, Li H, Feng J, Li C. Alcohol Use and Cognitive Functioning Among Middle-Aged and Older Adults in China: Findings of the China Health and Retirement Longitudinal Study Baseline Survey. *Alcohol Clin Exp Res.* 2018; 42:2054–60.  
<https://doi.org/10.1111/acer.13861>  
PMID:[30080253](https://pubmed.ncbi.nlm.nih.gov/30080253/)

## SUPPLEMENTARY MATERIALS

### Supplementary Tables

**Supplementary Table 1. Characteristics of participants with and without PSCI at 3 months.**

| Variable                              | With PSCI (n = 115) | Without PSCI (n = 127) | p       |
|---------------------------------------|---------------------|------------------------|---------|
| <b>Demographics (n/%)</b>             |                     |                        |         |
| Age (mean ± SD)                       | 61.94 (11.91)       | 55.97 (10.46)          | <0.0001 |
| BMI (mean ± SD)                       | 26.44 (4.50)        | 26.06 (3.74)           | 0.4951  |
| Male                                  | 87(68.50)           | 85(73.91)              | 0.3540  |
| Education ≤6 years                    | 44(34.92)           | 17(15.04)              | 0.0004  |
| Married                               | 76(77.55)           | 68(77.27)              | 0.9639  |
| Alcohol consumption                   | 22(18.49)           | 29(27.10)              | 0.1219  |
| Smoking habit                         | 65(54.17)           | 61(55.45)              | 0.8446  |
| ApoE ε4 carrier                       | 18(15.93)           | 20(18.69)              | 0.5880  |
| <b>Medical history (n/%)</b>          |                     |                        |         |
| HTN                                   | 94(76.42)           | 73(67.59)              | 0.1346  |
| DM                                    | 52(43.33)           | 30(28.30)              | 0.0190  |
| Dyslipidemia                          | 80(65.57)           | 82(74.55)              | 0.1371  |
| Heart disease                         | 30(25.86)           | 21(20.19)              | 0.3198  |
| <b>Stroke severity</b>                |                     |                        |         |
| NIHSS score (median/IQR)              | 4(2-6)              | 3(1-5)                 | 0.0145  |
| <b>TOAST classification (n/%)</b>     |                     |                        |         |
| Large artery atherosclerosis          | 35(29.91)           | 17(16.19)              | 0.0130  |
| Cardioembolism                        | 58(49.57)           | 73(69.52)              |         |
| Small vessel occlusion                | 14(11.97)           | 7(6.67)                |         |
| Other determined etiology             | 5(4.27)             | 1(0.95)                |         |
| Undetermined etiology                 | 5(4.27)             | 7(6.67)                |         |
| <b>Fazekas scale</b>                  |                     |                        |         |
| Periventricular white matter          |                     |                        |         |
| 0                                     | 29 (34.12)          | 40 (47.06)             | 0.0194  |
| 1                                     | 20 (23.53)          | 28 (32.94)             |         |
| 2                                     | 11 (12.94)          | 5 (5.88)               |         |
| 3                                     | 25 (29.41)          | 12 (14.12)             |         |
| Deep white matter                     |                     |                        |         |
| 0                                     | 19 (24.68)          | 31 (38.75)             | 0.0304  |
| 1                                     | 26 (33.77)          | 32 (40.00)             |         |
| 2                                     | 16 (20.78)          | 11 (13.75)             |         |
| 3                                     | 16 (20.78)          | 6 (7.50)               |         |
| <b>Plasma biomarkers (pg/mL)</b>      |                     |                        |         |
| Aβ 42                                 | 16.42 (1.28)        | 16.59 (1.47)           | 0.3559  |
| Aβ 40                                 | 48.92 (4.89)        | 49.39 (6.39)           | 0.7704  |
| Aβ 42/40 ratio                        | 0.34 (0.06)         | 0.36 (0.11)            | 0.3254  |
| Tau                                   | 21.09 (4.61)        | 22.04 (5.91)           | 0.1783  |
| BDNF                                  | 695.29 (250.20)     | 690.06 (255.13)        | 0.9348  |
| Ptau181                               | 3.65 (0.84)         | 3.78 (1.01)            | 0.2998  |
| <b>Cognitive function (mean ± SD)</b> |                     |                        |         |
| MoCA 3 months                         | 21.87 (6.90)        | 26.65 (3.13)           | <0.0001 |
| MoCA 12 months                        | 21.43 (7.96)        | 26.72 (4.73)           | <0.0001 |

PSCI, post-stroke cognitive impairment; BMI, body mass index; ApoE, apolipoprotein E; HTN, hypertension; DM, diabetic mellitus; NIHSS, National Institutes of Health Stroke Scale; TOAST, Trial of ORG 10172 in Acute Stroke Treatment; Aβ, amyloid beta; BDNF, brain-derived neurotrophic factor; MoCA, Montreal Cognitive Assessment.

**Supplementary Table 2. Characteristics of participants with and without progression to PSCI at 12 months from non-PSCI at 3 months.**

| Variable                              | With progression to PSCI ( <i>n</i> = 26) | Without progression to PSCI ( <i>n</i> = 70) | <i>p</i> |
|---------------------------------------|-------------------------------------------|----------------------------------------------|----------|
| <b>Demographics (n/%)</b>             |                                           |                                              |          |
| Age (mean ± SD)                       | 57.54 (10.54)                             | 54.41 (10.40)                                | 0.1956   |
| BMI (mean ± SD)                       | 25.89 (4.05)                              | 26.26 (3.64)                                 | 0.6911   |
| Male                                  | 18(69.23)                                 | 55(78.57)                                    | 0.3407   |
| Education ≤6 years                    | 3(11.54)                                  | 9(13.24)                                     | 1.0000   |
| Married                               | 13(65.00)                                 | 40(76.92)                                    | 0.3039   |
| Alcohol consumption                   | 5(19.23)                                  | 18(28.57)                                    | 0.3600   |
| Smoking habit                         | 12(46.15)                                 | 39(60.00)                                    | 0.2293   |
| ApoE ε4 carrier                       | 2(8.33)                                   | 12(17.65)                                    | 0.3423   |
| <b>Medical history (n/%)</b>          |                                           |                                              |          |
| HTN                                   | 17(70.83)                                 | 41(63.08)                                    | 0.4955   |
| DM                                    | 8(36.36)                                  | 15(23.08)                                    | 0.2219   |
| Dyslipidemia                          | 20(83.33)                                 | 50(74.63)                                    | 0.3850   |
| Heart disease                         | 2(9.09)                                   | 16(25.00)                                    | 0.1391   |
| <b>Stroke severity</b>                |                                           |                                              |          |
| NIHSS score (median/IQR)              | 3.5(2-4.5)                                | 3(1-5)                                       | 0.4633   |
| <b>TOAST classification (n/%)</b>     |                                           |                                              |          |
| Large artery atherosclerosis          | 4(20.00)                                  | 7(10.45)                                     | 0.4906   |
| Cardioembolism                        | 15(75.00)                                 | 49(73.13)                                    |          |
| Small vessel occlusion                | 0(0.00)                                   | 5(7.46)                                      |          |
| Other determined etiology             | 0(0.00)                                   | 0(0.00)                                      |          |
| Undetermined etiology                 | 1(5.00)                                   | 6(8.96)                                      |          |
| <b>Fazekas scale</b>                  |                                           |                                              |          |
| Periventricular white matter          |                                           |                                              |          |
| 0                                     | 11 (47.83)                                | 24 (47.06)                                   | 0.2508   |
| 1                                     | 5 (21.74)                                 | 20 (39.22)                                   |          |
| 2                                     | 2 (8.70)                                  | 2 (3.92)                                     |          |
| 3                                     | 5 (21.74)                                 | 5 (9.80)                                     |          |
| Deep white matter                     |                                           |                                              |          |
| 0                                     | 7 (30.43)                                 | 19 (41.30)                                   | 0.0435   |
| 1                                     | 8 (34.78)                                 | 20 (43.48)                                   |          |
| 2                                     | 4 (17.39)                                 | 7 (15.22)                                    |          |
| 3                                     | 4 (17.39)                                 | 0 (0.00)                                     |          |
| <b>Plasma biomarkers (pg/mL)</b>      |                                           |                                              |          |
| Aβ 42                                 | 16.58 (2.11)                              | 16.66 (1.35)                                 | 0.8769   |
| Aβ 40                                 | 51.08 (7.64)                              | 46.78 (5.13)                                 | 0.1381   |
| Aβ 42/40 ratio                        | 0.34 (0.13)                               | 0.39 (0.10)                                  | 0.3467   |
| Tau                                   | 21.19 (6.20)                              | 22.45 (5.97)                                 | 0.3795   |
| BDNF                                  | 675.11 (274.78)                           | 684.29 (247.17)                              | 0.9247   |
| Ptau181                               | 3.33 (0.96)                               | 3.92 (1.06)                                  | 0.0182   |
| <b>Cognitive function (mean ± SD)</b> |                                           |                                              |          |
| MoCA 3 months                         | 25.81 (4.01)                              | 27.09 (2.69)                                 | 0.1418   |
| MoCA 12 months                        | 24.60 (6.08)                              | 27.86 (2.22)                                 | 0.0145   |

PSCI, post-stroke cognitive impairment; BMI, body mass index; ApoE, apolipoprotein E; HTN, hypertension; DM, diabetic mellitus; NIHSS, National Institutes of Health Stroke Scale; TOAST, Trial of ORG 10172 in Acute Stroke Treatment; Aβ, amyloid beta; BDNF, brain-derived neurotrophic factor; MoCA, Montreal Cognitive Assessment.



**Supplementary Table 3. Multivariate analysis results for participants with PSCI at 3 months.**

|                         | Model I          |          | Model II         |          | Model III        |          |
|-------------------------|------------------|----------|------------------|----------|------------------|----------|
|                         | OR (95%CI)       | <i>p</i> | OR (95%CI)       | <i>p</i> | OR (95%CI)       | <i>p</i> |
| Non-ApoE ε4 carrier     | 1.0              |          | 1.0              |          | 1.0              |          |
| ApoE ε4 carrier         | 0.80 (0.39–1.68) | 0.5587   | 0.71 (0.33–1.52) | 0.3756   | 0.79 (0.31–1.99) | 0.6181   |
| Age                     | 1.03 (1.00–1.06) | 0.0245   | 1.04 (1.01–1.07) | 0.0111   | 1.04 (1.01–1.09) | 0.0278   |
| Education >6 years      | 0.46 (0.22–0.95) | 0.0368   | 0.60 (0.28–1.29) | 0.1885   | 0.52 (0.21–1.31) | 0.1669   |
| Initial stroke severity |                  |          | 1.10 (1.00–1.20) | 0.0421   | 1.09 (0.98–1.22) | 0.1205   |
| Diabetes                |                  |          |                  |          | 1.95 (0.90–4.22) | 0.0883   |
| Fazekas scale           |                  |          |                  |          | 1.16 (0.81–1.66) | 0.4130   |

Model I: Adjusted for age and education level.

Model II: Adjusted for age, education level, and initial stroke severity.

Model III: Adjusted for age, education level, initial stroke severity, diabetes, and Fazekas scale.

PSCI, post-stroke cognitive impairment; OR, odds ratio; ApoE, apolipoprotein E.

**Supplementary Table 4. Multivariate analysis results for participants who developed PSCI at 12 months.**

|                         | Model I          |          | Model II         |          | Model III        |          |
|-------------------------|------------------|----------|------------------|----------|------------------|----------|
|                         | OR (95%CI)       | <i>p</i> | OR (95%CI)       | <i>p</i> | OR (95%CI)       | <i>p</i> |
| Non-ApoE ε4 carrier     | 1.0              |          | 1.0              |          | 1.0              |          |
| ApoE ε4 carrier         | 0.41 (0.08–2.00) | 0.2692   | 0.35 (0.06–2.23) | 0.2678   | 0.56 (0.08–4.17) | 0.5682   |
| Education >6 years      | 1.02 (0.25–4.21) | 0.9805   | 1.01 (0.22–4.62) | 0.9907   | 1.11 (0.13–9.65) | 0.9256   |
| Initial stroke severity |                  |          | 1.12 (0.95–1.32) | 0.1762   | 1.20 (0.98–1.48) | 0.0743   |
| Fazekas scale           |                  |          |                  |          | 2.58 (1.19–5.60) | 0.0165   |

Model I: Adjusted for education level.

Model II: Adjusted for education level and initial stroke severity.

Model III: Adjusted for education level, initial stroke severity, and Fazekas scale at 3M.

PSCI, post-stroke cognitive impairment; OR, odds ratio; ApoE, apolipoprotein E.
